# Supplementary material for: Characterization of key aroma compounds of fried pepper sauce under different pretreatment processes
Source: Royal Society of Chemistry journal article supplement (doi:10.1039/d4ra02343a), 2024-01-01
Supplement: d4ra02343a1.pdf [file d4ra02343a1.pdf]

Supplementary Materials

**Characterization of key aroma compounds of fried pepper sauce  
under different pretreatment processes**

**Hao Luo<sup>a</sup>, Yongjun Wu<sup>\*a</sup>, Jin Jin<sup>a</sup>, Lincheng Zhang<sup>a</sup>, Shuoqiu Tong<sup>a</sup>, Cen Li<sup>a</sup>,  
Qibo Tan<sup>a</sup>, Qiqin Han<sup>a</sup>**

<sup>a</sup>Key Laboratory of Plant Resource Conservation and Germplasm Innovation in Mountainous Region (Ministry of Education), College of Life Sciences/Institute of Agro-Bioengineering, Guizhou University, Guiyang 550025, China

\*Correspondence: [wjbio@163.com](mailto:wjbio@163.com), ORCID: 0000-0002-6732-8276

**For**

**RSC**

**Advances**

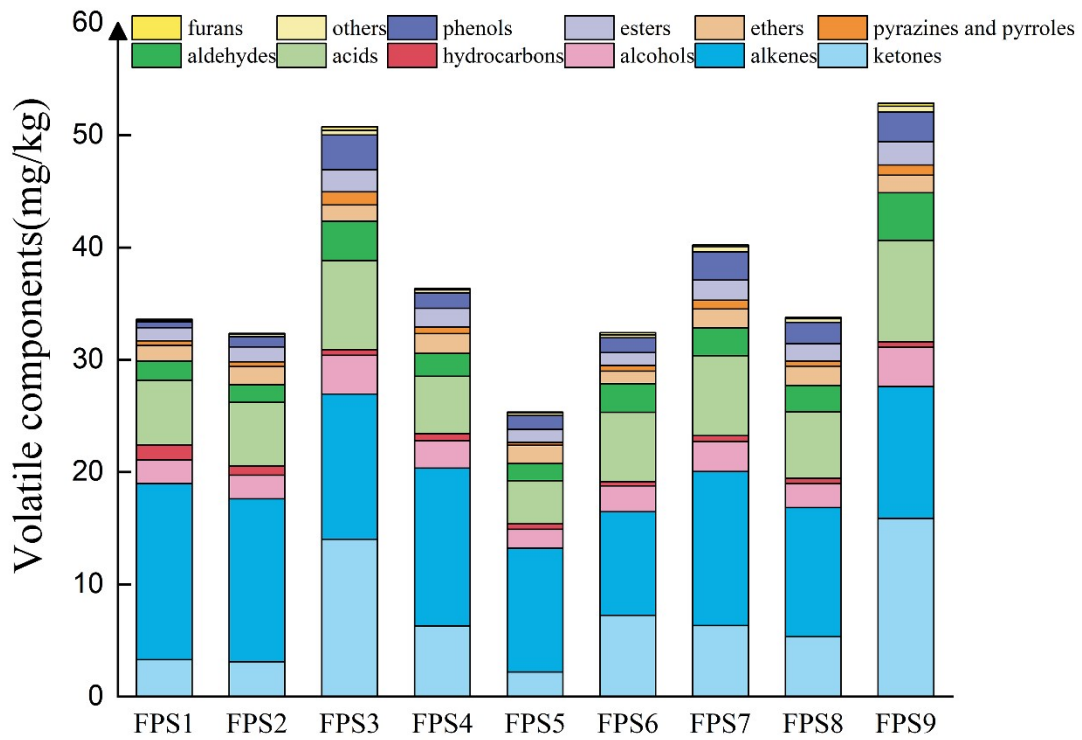

**Fig. S1** Fried pepper sauce volatile component type for different pre-treatment process  
**FPS1:** Soaking in 60°C water and mashing, **FPS2:** Soaking in 100°C water and mashing, **FPS3:** Steaming and mashing, **FPS4:** Soaking in 60°C water and mincing, **FPS5:** Soaking in 100°C water and mincing, **FPS6:** Steaming and mincing, **FPS7:** Soaking in 60°C water and horizontal knife cutting, **FPS8:** Soaking in 100°C water and horizontal knife cutting, **FPS9:** Steaming and horizontal knife cutting.

**Table S1** Identification and quantification of volatile compounds in nine FPS samples

| No.      | Aroma compounds                              | CAS        | RI <sup>a</sup> | Compound content (µg /kg) |               |                |                |                |                |                |                |                | Identification methods <sup>b</sup> |
|----------|----------------------------------------------|------------|-----------------|---------------------------|---------------|----------------|----------------|----------------|----------------|----------------|----------------|----------------|-------------------------------------|
|          |                                              |            |                 | FPS1                      | FPS2          | FPS3           | FPS4           | FPS5           | FPS6           | FPS7           | FPS8           | FPS9           |                                     |
| <b>A</b> | <b>Alkenes</b>                               |            |                 |                           |               |                |                |                |                |                |                |                |                                     |
| A1       | <i>α</i> -Thujene                            | 2867-05-2  | 921             | 488.15±39.70              | 471.62±9.51   | 444.18±27.31   | 478.78±26.64   | 371.21±11.32   | 318.07±30.94   | 489.78±21.66   | 414.04±22.56   | 448.05±13.02   | MS/RI/O                             |
| A2       | (+)- <i>α</i> -Pinene                        | 7785-70-8  | 927             | 63.60±9.70                | 75.25±3.16    | 94.36±3.38     | 74.82±2.08     | 63.40±2.44     | 46.46±3.22     | 78.95±2.95     | 55.72±2.88     | 63.17±0.94     | MS/RI                               |
| A3       | Sabinene                                     | 3387-41-5  | 967             | 788.04±75.50              | 801.62±26.01  | 838.56±43.73   | 832.28±36.95   | 645.48±22.31   | 537.14±49.08   | 855.58±31.35   | 679.83±35.78   | 746.92±15.80   | MS/RI                               |
| A4       | Myrcene                                      | 123-35-3   | 986             | 4862.37±72.90             | 4249.60±46.05 | 3154.68±264.33 | 3800.38±213.55 | 3016.31±149.51 | 2374.26±228.42 | 3409.09±330.00 | 2940.22±127.00 | 2690.71±201.03 | MS/RI                               |
| A5       | <i>α</i> -Phellandrene                       | 99-83-2    | 998             | 327.61±14.49              | 279.46±7.83   | 215.61±12.65   | 236.56±16.54   | 191.80±12.39   | 155.62±14.71   | 219.40±15.62   | 185.39±7.53    | 198.12±5.71    | MS/RI                               |
| A6       | <i>α</i> -terpinene                          | 99-86-5    | 1011            | 274.25±28.37              | 258.99±2.84   | 218.70±14.00   | 230.81±16.39   | 183.25±12.99   | 160.20±17.22   | 222.14±10.33   | 194.58±7.08    | 217.73±6.38    | MS/RI                               |
| A7       | <i>D</i> -Limonene                           | 5989-27-5  | 1024            | 5593.50±63.92             | 4950.24±89.03 | 4989.65±297.11 | 5030.20±231.73 | 3967.51±141.22 | 3553.32±288.47 | 5180.51±305.59 | 4413.57±177.80 | 4634.87±201.74 | MS/RI                               |
| A8       | ( <i>E</i> )- <i>β</i> -ocimene              | 3779-61-1  | 1033            | 1622.06±178.10            | 1594.08±12.49 | 1202.91±105.14 | 1511.15±92.88  | 1160.43±92.33  | 895.99±109.21  | 1338.34±118.78 | 1138.25±48.03  | 1053.74±56.50  | MS/RI                               |
| A9       | ( <i>Z</i> )- <i>β</i> -ocimene              | 3338-55-4  | 1043            | 664.71±137.55             | 803.22±19.74  | 677.48±60.09   | 831.64±45.49   | 631.74±68.25   | 494.69±62.00   | 735.90±58.78   | 615.00±30.16   | 598.98±25.72   | MS/RI                               |
| A10      | <i>γ</i> -Terpinene                          | 99-85-4    | 1053            | 652.13±51.25              | 598.96±4.89   | 545.98±33.30   | 599.35±41.10   | 442.59±28.12   | 388.60±42.97   | 566.55±23.76   | 491.08±17.98   | 546.79±14.55   | MS/RI                               |
| A11      | Terpinolene                                  | 586-62-9   | 1083            | 109.46±12.41              | 107.01±3.45   | 95.76±5.90     | 103.46±6.21    | 77.11±4.17     | 73.42±1.49     | 100.51±3.59    | 87.42±2.07     | 97.65±2.82     | MS/RI/O                             |
| A12      | 1,5,8- <i>p</i> -Menthatriene                | 21195-59-5 | 1116            | 21.16±4.56                | 26.85±1.52    | 24.33±1.57     | 27.08±0.65     | 21.42±2.06     | 17.08±2.02     | 26.12±3.42     | 20.93±3.98     | 22.31±1.29     | MS/RI                               |
| A13      | 2,6-Dimethyl-2,4,6-octatriene                | 673-84-7   | 1123            | ND                        | ND            | 132.84±14.27   | ND             | ND             | ND             | 152.10±15.39   | ND             | 127.22±6.95    | MS/RI                               |
| A14      | ( <i>E,Z</i> )-2,6-Dimethylocta-2,4,6-triene | 7216-56-0  | 1136            | 99.34±24.16               | 107.62±1.43   | 71.75±5.40     | 92.77±4.87     | 69.75±5.41     | 56.54±6.59     | 78.79±7.53     | 65.76±3.42     | 65.92±5.04     | MS/RI                               |
| A15      | Copaene                                      | 3856-25-5  | 1372            | 7.32±0.77                 | 8.90±0.56     | ND             | ND             | 7.83±0.88      | 7.46±0.49      | 12.21±0.83     | 9.65±0.63      | ND             | MS/RI                               |
| A16      | Beta-Elemene                                 | 515-13-9   | 1387            | 27.07±1.77                | 33.57±1.83    | 47.93±0.89     | 43.91±3.18     | 26.84±3.56     | 27.22±1.60     | 47.54±3.38     | 34.42±2.44     | 53.58±3.24     | MS/RI                               |
| A17      | Caryophyllene                                | 87-44-5    | 1416            | 44.25±1.97                | 48.16±2.58    | 63.18±1.71     | 57.46±2.52     | 40.64±3.95     | 39.95±3.00     | 64.16±2.99     | 51.68±3.43     | 69.57±1.24     | MS/RI                               |
| A18      | (+)-Bicyclogermacrene                        | 24703-35-3 | 1428            | 2.28±0.27                 | 3.14±0.16     | 5.10±0.34      | 4.02±0.36      | 2.59±0.44      | 2.69±0.23      | 4.68±0.60      | 3.36±0.28      | 5.13±0.44      | MS/RI                               |
| A19      | Humulene                                     | 6753-98-6  | 1450            | 11.13±1.36                | 14.34±1.01    | 20.88±0.23     | 19.14±1.27     | 12.93±1.61     | 12.24±0.79     | 20.88±1.45     | 15.98±0.86     | 23.04±1.19     | MS/RI                               |

Table S1 (Contd.)

| No.      | Aroma compounds                             | CAS        | RI <sup>a</sup> | Compound content (µg /kg) |              |              |              |              |              |              |              |                | Identification methods <sup>b</sup> |
|----------|---------------------------------------------|------------|-----------------|---------------------------|--------------|--------------|--------------|--------------|--------------|--------------|--------------|----------------|-------------------------------------|
|          |                                             |            |                 | FPS1                      | FPS2         | FPS3         | FPS4         | FPS5         | FPS6         | FPS7         | FPS8         | FPS9           |                                     |
| A20      | (1 <i>R</i> ,6 <i>S</i> )-gamma-himachalene | 53111-25-4 | 1474            | ND                        | 5.14±0.23    | ND           | 6.95±0.49    | 5.61±0.83    | ND           | 8.61±0.85    | 8.02±0.51    | ND             | MS/RI                               |
| A21      | Germacrene D                                | 23986-74-5 | 1477            | ND                        | ND           | ND           | ND           | 6.47±1.00    | ND           | 12.31±1.41   | 10.96±1.02   | 16.49±1.07     | MS/RI                               |
| A22      | (-)-beta-Selinene                           | 17066-67-0 | 1482            | 1.33±0.17                 | 1.87±0.16    | 2.39±0.33    | ND           | 1.72±0.32    | ND           | ND           | ND           | ND             | MS/RI                               |
| A23      | alpha-Muuroloene                            | 10208-80-7 | 1495            | ND                        | 9.04±0.68    | ND             | MS/RI                               |
| A24      | alpha-Farnesene                             | 502-61-4   | 1501            | ND                        | ND           | ND           | ND           | ND           | ND           | 1.26±0.24    | ND           | ND             | MS/RI                               |
| A25      | (-)-gamma-Cadinene                          | 39029-41-9 | 1509            | 17.06±2.65                | 25.14±1.83   | 39.94±2.57   | 34.85±2.82   | 22.74±4.17   | 20.96±1.54   | 37.77±4.89   | 28.23±2.17   | 40.72±4.03     | MS/RI                               |
| A26      | (+)-delta-Cadinene                          | 483-76-1   | 1518            | 27.05±2.98                | 34.29±1.96   | 52.62±3.69   | 45.40±3.38   | 29.74±4.99   | 27.96±1.87   | 48.94±5.72   | 36.83±2.49   | 53.97±5.65     | MS/RI                               |
| <b>B</b> | <b>Ketones</b>                              |            |                 |                           |              |              |              |              |              |              |              |                |                                     |
| B1       | Acetone                                     | 67-64-1    | -               | 374.92±33.10              | 277.13±4.48  | 420.26±17.96 | 350.63±29.59 | 287.71±25.73 | 387.00±21.91 | 321.70±42.80 | 291.88±25.38 | 448.12±49.84   | MS                                  |
| B2       | Hydroxyacetone                              | 116-09-6   | -               | 492.53±9.28               | 360.71±17.51 | 979.10±28.99 | 492.07±50.07 | 257.48±34.97 | 671.28±55.24 | 434.11±29.94 | 400.22±45.47 | 1064.40±109.81 | MS                                  |
| B3       | 2,3-Pentanedione                            | 600-14-6   | -               | ND                        | ND           | ND           | ND           | ND           | 30.82±6.87   | ND           | ND           | ND             | MS                                  |
| B4       | Acetoin                                     | 513-86-0   | -               | 36.15±8.14                | 52.17±1.65   | 59.61±30.70  | 32.38±14.11  | 17.93±2.90   | 40.68±11.26  | 39.44±21.78  | 24.93±2.95   | 70.95±20.68    | MS                                  |
| B5       | 2-Methyltetrahydrofuran-3-one               | 3188-00-9  | 801             | ND                        | ND           | 8.14±2.06    | ND           | ND           | 9.14±6.14    | ND           | ND           | 7.45±0.31      | MS/RI                               |
| B6       | Acetoxycetone                               | 592-20-1   | 865             | 49.65±4.46                | ND           | 53.24±2.30   | 44.28±3.26   | 16.43±4.22   | 52.55±5.83   | 45.58±4.15   | 28.06±9.91   | 75.62±7.81     | MS/RI                               |
| B7       | 4-Cyclopentene-1,3-dione                    | 930-60-9   | 878             | 28.07±3.39                | 20.51±1.84   | 229.82±7.83  | 49.38±2.93   | 10.47±1.45   | 67.27±6.49   | 51.92±4.79   | 38.32±4.85   | 199.61±3.01    | MS/RI                               |
| B8       | <i>N</i> -Methylpyrrolidone                 | 872-50-4   | 1036            | 50.76±3.54                | 47.38±1.17   | 327.64±24.69 | 84.31±5.84   | ND           | 128.85±17.34 | 127.72±6.24  | 93.18±6.10   | 265.85±6.57    | MS/RI                               |
| B9       | Furyl hydroxymethyl ketone                  | 17678-19-2 | 1078            | ND                        | ND           | ND           | 29.73±2.13   | ND           | 62.99±6.99   | 42.98±3.14   | 28.33±4.18   | 181.04±21.19   | MS/RI/O                             |
| B10      | 2-Pyrrolidinone                             | 616-45-5   | 1088            | ND                        | ND           | ND           | ND           | ND           | 31.50±5.18   | ND           | ND           | ND             | MS/RI/O                             |



Table S1 (Contd.)

| No. | Aroma compounds                | CAS        | RI <sup>a</sup> | Compound content ( $\mu\text{g}/\text{kg}$ ) |              |              |              |              |              |              |              |               | Identification methods <sup>b</sup> |
|-----|--------------------------------|------------|-----------------|----------------------------------------------|--------------|--------------|--------------|--------------|--------------|--------------|--------------|---------------|-------------------------------------|
|     |                                |            |                 | FPS1                                         | FPS2         | FPS3         | FPS4         | FPS5         | FPS6         | FPS7         | FPS8         | FPS9          |                                     |
| E1  | 2-Methylpropanal               | 78-84-2    | -               | 190.64±26.28                                 | 98.81±8.94   | 207.80±34.78 | 132.80±8.34  | 70.18±10.38  | 171.48±7.98  | 156.55±32.65 | 138.12±16.54 | 221.77±13.95  | MS/O/S                              |
| E2  | 3-Methylbutanal                | 590-86-3   | -               | 384.62±109.49                                | 279.54±79.57 | 307.58±9.29  | 193.77±29.86 | 144.71±12.75 | 225.08±16.30 | 222.32±21.54 | 224.49±8.11  | 259.13±3.50   | MS/O/S                              |
| E3  | 2-Methylbutanal                | 96-17-3    | -               | 236.64±22.32                                 | 161.46±15.54 | 319.30±7.65  | 180.19±26.37 | 106.57±8.85  | 225.64±16.87 | 225.57±18.71 | 212.92±14.19 | 298.66±6.84   | MS                                  |
| E4  | Hexanal                        | 66-25-1    | 792             | 81.28±11.25                                  | 74.45±12.74  | 37.08±2.40   | 41.16±4.58   | 29.50±3.23   | ND           | 41.35±4.50   | 37.12±3.66   | 36.05±3.10    | MS/RI                               |
| E5  | 3-Furaldehyde                  | 498-60-2   | 826             | 230.45±38.11                                 | 179.14±4.38  | 792.36±46.19 | 307.94±10.21 | 113.16±15.75 | 462.17±47.69 | 322.75±21.66 | 337.96±26.04 | 1061.10±32.57 | MS/RI                               |
| E6  | Heptanal                       | 111-71-7   | 896             | 22.29±2.50                                   | 17.16±0.29   | 9.32±0.97    | 17.03±3.35   | 12.78±1.99   | 11.21±1.70   | 13.36±1.76   | 13.35±1.43   | 12.53±1.63    | MS/RI                               |
| E7  | Methional                      | 3268-49-3  | 900             | 20.55±6.35                                   | 18.78±0.34   | 59.46±3.01   | 21.85±1.90   | 11.55±2.38   | 28.11±4.11   | 18.90±4.96   | 18.05±1.57   | 23.03±1.10    | MS/RI/O/S                           |
| E8  | 2-Pyridinecarboxaldehyde       | 1121-60-4  | 943             | ND                                           | ND           | ND           | ND           | ND           | 6.86±1.20    | 4.06±1.73    | ND           | 11.13±0.97    | MS/RI                               |
| E9  | ( <i>E</i> )-Hept-2-enal       | 18829-55-5 | 951             | 49.09±10.97                                  | 52.94±4.53   | 143.00±8.33  | 68.17±4.13   | 61.87±6.62   | 85.95±9.21   | 88.03±11.16  | 67.22±4.24   | 139.28±3.24   | MS/RI                               |
| E10 | Benzaldehyde                   | 100-52-7   | 954             | 62.70±9.80                                   | 69.36±4.15   | 112.41±2.79  | 84.19±2.23   | 66.30±4.99   | 82.36±6.09   | 121.38±5.93  | 99.07±4.70   | 126.16±2.66   | MS/RI                               |
| E11 | 5-Methylfurfural               | 620-02-0   | 958             | 17.02±3.96                                   | 16.15±0.43   | 131.06±4.83  | 31.69±1.64   | 11.82±1.24   | 61.23±4.49   | 47.70±1.47   | 31.67±2.75   | 131.10±1.78   | MS/RI                               |
| E12 | Octanal                        | 124-13-0   | 997             | ND                                           | 40.62±0.86   | ND           | 55.41±4.66   | 40.72±6.39   | 31.93±3.39   | ND           | 36.95±2.34   | ND            | MS/RI                               |
| E13 | ( <i>E,E</i> )-2,4-Heptadienal | 4313-05-3  | 1005            | 27.93±5.27                                   | 31.95±3.46   | 117.40±1.26  | 58.90±2.11   | 51.81±7.39   | 74.29±6.86   | 77.42±6.81   | 69.07±7.35   | 142.36±18.46  | MS/RI                               |
| E14 | Benzeneacetaldehyde            | 122-78-1   | 1039            | 158.68±39.34                                 | 188.84±19.60 | 406.15±36.81 | 271.89±15.38 | 271.89±34.58 | 377.63±38.96 | 283.46±29.63 | 383.94±20.82 | 576.28±30.78  | MS/RI/O/S                           |
| E15 | Nonanal                        | 124-19-6   | 1099            | 104.63±16.26                                 | 111.94±4.86  | 139.51±7.37  | 130.57±10.91 | 126.17±5.24  | 126.51±12.14 | 173.09±23.70 | 144.64±22.49 | 221.63±1.21   | MS/RI                               |
| E16 | ( <i>E</i> )-2-Nonenal         | 18829-56-6 | 1155            | 14.72±13.79                                  | 32.14±4.43   | ND           | 74.63±10.03  | 34.38±5.10   | 53.87±4.55   | 39.80±7.92   | 42.64±2.49   | ND            | MS/RI/O/S                           |
| E17 | 3-Ethylbenzaldehyde            | 34246-54-3 | 1158            | ND                                           | ND           | ND           | ND           | 2.88±0.07    | ND           | ND           | ND           | ND            | MS/RI                               |
| E18 | Decanal                        | 112-31-2   | 1200            | 6.16±1.80                                    | 7.89±0.94    | 24.69±2.41   | 14.68±3.40   | 10.45±0.83   | 12.59±2.88   | 22.41±9.96   | 14.21±3.60   | 30.50±2.18    | MS/RI                               |
| E19 | ( <i>2E</i> )-2-Decenal        | 3913-81-3  | 1256            | 40.04±11.60                                  | 49.64±8.62   | 143.82±2.67  | 96.70±5.95   | 97.23±10.60  | 123.74±7.10  | 141.49±11.85 | 102.80±5.06  | 210.33±18.27  | MS/RI/O/S                           |
| E20 | 2-Phenyl-2-butenal             | 4411-89-6  | 1268            | 8.82±1.19                                    | ND           | 66.93±3.57   | ND           | ND           | 38.93±1.59   | 34.26±6.15   | ND           | ND            | MS/RI                               |
| E21 | ( <i>E,Z</i> )-2,4-Decadienal  | 25152-83-4 | 1288            | 7.85±2.53                                    | 12.49±2.04   | 46.39±1.75   | 24.66±2.81   | 24.90±2.86   | 34.68±1.29   | 38.30±4.65   | 34.47±2.74   | 76.18±7.76    | MS/RI/O                             |

Table S1 (Contd.)

| No.      | Aroma compounds                           | CAS        | RI <sup>a</sup> | Compound content (µg /kg) |               |                |                |                |                |                |                |                | Identification methods <sup>b</sup> |
|----------|-------------------------------------------|------------|-----------------|---------------------------|---------------|----------------|----------------|----------------|----------------|----------------|----------------|----------------|-------------------------------------|
|          |                                           |            |                 | FPS1                      | FPS2          | FPS3           | FPS4           | FPS5           | FPS6           | FPS7           | FPS8           | FPS9           |                                     |
| E22      | (2 <i>E</i> ,4 <i>E</i> )-Deca-2,4-dienal | 25152-84-5 | 1310            | 52.59±15.57               | 83.79±15.11   | 359.58±20.72   | 168.33±15.23   | 185.07±24.64   | 233.97±16.52   | 325.41±46.14   | 263.31±21.66   | 518.34±73.40   | MS/RI/O/S                           |
| E23      | 2-Undecenal                               | 2463-77-6  | 1357            | 19.71±6.71                | 34.75±4.51    | 94.75±4.41     | 58.82±5.88     | 59.50±6.64     | 68.47±2.79     | 78.84±8.53     | 79.30±4.53     | 136.72±11.69   | MS/RI                               |
| <b>F</b> | <b>Phenols</b>                            |            |                 |                           |               |                |                |                |                |                |                |                |                                     |
| F1       | Maltol                                    | 118-71-8   | 1107            | ND                        | ND            | 181.23±9.10    | ND             | ND             | 93.31±5.05     | 100.80±7.08    | 66.24±5.77     | 176.92±10.42   | MS/RI                               |
| F2       | 2-Methoxy-4-vinylphenol                   | 7786-61-0  | 1308            | ND                        | ND            | 115.92±7.31    | ND             | ND             | ND             | ND             | ND             | ND             | MS/RI                               |
| F3       | 2,6-Dimethoxy-4-vinylphenol               | 28343-22-8 | 1563            | 520.39±128.85             | 916.19±48.04  | 2785.84±650.49 | 1356.16±141.72 | 1219.60±148.46 | 1226.29±143.71 | 2414.60±569.47 | 1843.64±301.92 | 2475.86±420.79 | MS/RI                               |
| <b>G</b> | <b>Ethers</b>                             |            |                 |                           |               |                |                |                |                |                |                |                |                                     |
| G1       | Dimethyl ether                            | 115-10-6   | -               | 828.37±32.29              | 1143.66±49.36 | 867.08±17.98   | 1246.69±45.07  | 1220.25±75.56  | 761.27±40.71   | 1148.90±102.91 | 1301.45±82.89  | 1085.46±23.08  | MS                                  |
| G2       | Eucalyptol                                | 470-82-6   | 1026            | 564.16±30.35              | 484.65±17.65  | 572.05±20.28   | 523.61±25.02   | 407.83±17.74   | 360.20±29.96   | 542.31±20.21   | 418.12±21.72   | 487.47±7.09    | MS/RI/O/S                           |
| <b>H</b> | <b>Esters</b>                             |            |                 |                           |               |                |                |                |                |                |                |                |                                     |
| H1       | Methyl acetate                            | 79-20-9    | -               | 104.59±17.46              | 63.26±15.49   | 81.34±21.93    | 73.75±2.78     | 54.66±16.56    | 83.65±6.78     | 79.09±4.85     | 74.92±16.67    | 105.66±25.01   | MS                                  |
| H2       | Acetic acid ethenyl ester                 | 108-05-4   | -               | 89.48±5.26                | 42.64±7.78    | 70.35±6.77     | 38.57±4.99     | 27.40±9.11     | 58.00±9.34     | 38.28±13.33    | 37.54±15.79    | 74.74±16.58    | MS/O                                |
| H3       | 4-Hydroxybutanoic acid                    | 591-81-1   | 907             | 298.10±85.01              | 165.82±5.19   | 385.89±27.53   | 185.68±10.86   | 71.40±6.32     | 198.85±16.97   | 221.06±25.61   | 144.83±24.10   | 338.07±12.84   | MS/RI                               |
| H4       | Octyl acetate                             | 112-14-1   | 1206            | 16.91±2.14                | 24.41±3.47    | 34.98±1.27     | 35.12±4.22     | 23.02±3.99     | 21.55±3.96     | 34.92±2.50     | 26.46±1.51     | 36.12±0.37     | MS/RI                               |
| H5       | Linalyl acetate                           | 115-95-7   | 1251            | 228.33±21.26              | 437.12±33.31  | 441.71±19.43   | 482.74±28.66   | 380.41±44.27   | 225.89±21.81   | 446.38±19.12   | 476.32±33.21   | 473.19±10.56   | MS/RI                               |
| H6       | 4-Terpinenyl acetate                      | 4829-04-9  | 1295            | 76.17±7.08                | 86.97±5.12    | 119.01±4.93    | 112.33±5.69    | 77.82±7.51     | 75.26±6.24     | 119.95±6.75    | 99.75±5.00     | 130.63±3.92    | MS/RI                               |
| H7       | α-Terpinyl acetate                        | 80-26-2    | 1345            | 305.37±22.44              | 433.71±50.71  | 707.29±18.02   | 668.24±49.79   | 456.30±62.25   | 425.62±32.56   | 721.84±43.11   | 564.94±40.11   | 779.61±36.01   | MS/RI                               |
| H8       | Citronellyl acetate                       | 150-84-5   | 1347            | 27.90±5.42                | 33.58±2.51    | 50.03±1.16     | 43.90±3.51     | 31.69±4.44     | 29.94±1.12     | 49.34±1.35     | 38.17±2.21     | 54.34±3.53     | MS/RI                               |
| H9       | Geranyl acetate                           | 105-87-3   | 1377            | 8.82±3.55                 | 18.87±3.61    | 41.84±0.86     | 34.20±2.86     | 25.04±3.10     | 22.80±1.20     | 39.79±3.66     | 31.29±2.40     | 45.19±2.44     | MS/RI/O                             |
| H10      | Ethyl palmitate                           | 628-97-7   | 1981            | 1.57±1.16                 | 7.17±1.59     | 31.15±4.49     | 11.22±2.46     | 15.97±1.49     | 14.52±2.66     | 32.34±6.81     | 25.66±1.65     | 18.91±0.21     | MS/RI                               |

Table S1 (Contd.)

| No.      | Aroma compounds                   | CAS        | RI <sup>a</sup> | Compound content (µg /kg) |              |              |              |              |              |              |              |              | Identification methods <sup>b</sup> |
|----------|-----------------------------------|------------|-----------------|---------------------------|--------------|--------------|--------------|--------------|--------------|--------------|--------------|--------------|-------------------------------------|
|          |                                   |            |                 | FPS1                      | FPS2         | FPS3         | FPS4         | FPS5         | FPS6         | FPS7         | FPS8         | FPS9         |                                     |
| H11      | Linoleic acid ethyl ester         | 544-35-4   | 2154            | 10.19±0.76                | 2.45±1.11    | 10.03±2.70   | 2.55±0.49    | 5.02±1.12    | 2.74±0.54    | 12.10±3.58   | 7.93±1.28    | 4.11±0.69    | MS/RI                               |
| H12      | Ethyl Oleate                      | 111-62-6   | 2160            | ND                        | ND           | ND           | ND           | ND           | ND           | 5.98±1.06    | 5.33±0.69    | ND           | MS/RI                               |
| <b>I</b> | <b>Hydrocarbons</b>               |            |                 |                           |              |              |              |              |              |              |              |              |                                     |
| I1       | Heptane                           | 142-82-5   | -               | ND                        | ND           | ND           | ND           | 29.84±1.32   | ND           | ND           | ND           | ND           | MS                                  |
| I2       | 1,3-Dimethylbenzene               | 108-38-3   | 861             | 59.41±5.02                | 48.41±0.81   | 89.61±7.67   | 53.38±4.20   | 19.48±1.07   | 39.07±5.13   | 76.20±11.41  | 59.32±3.16   | 95.68±6.84   | MS/RI                               |
| I3       | o-Cymene                          | 527-84-4   | 1019            | 1131.99±178.35            | 684.75±44.26 | 292.02±26.69 | 460.92±37.85 | 342.17±10.54 | 255.24±23.70 | 360.84±46.04 | 316.96±21.10 | 292.10±25.50 | MS/RI                               |
| I4       | 4-Ethenyl-1,2-dimethylbenzene     | 27831-13-6 | 1084            | 66.89±14.19               | ND           | MS/RI                               |
| I5       | 1,2,3,5-tetramethylbenzen         | 527-53-7   | 1125            | 76.23±12.37               | 85.64±2.56   | 72.78±5.94   | 86.73±3.23   | 69.61±3.51   | 55.17±5.48   | 81.47±7.26   | 66.76±2.99   | ND           | MS/RI                               |
| I6       | Naphthalene                       | 91-20-3    | 1177            | ND                        | ND           | 44.66±1.30   | ND           | ND           | ND           | ND           | ND           | ND           | MS/RI                               |
| I7       | 1-Nonyl-2-propan-2-ylcyclopropane | 41977-39-3 | 1438            | ND                        | ND           | ND           | ND           | ND           | ND           | ND           | 6.34±0.26    | ND           | MS/RI                               |
| I8       | 2-Methyltetradecane               | 1560-95-8  | 1455            | 3.77±1.27                 | 8.53±1.18    | 12.08±0.87   | 11.87±1.57   | 9.02±0.68    | 8.67±0.85    | 17.14±2.51   | 13.92±1.28   | 16.93±0.70   | MS/RI                               |
| <b>J</b> | <b>Pyrazines and pyrroles</b>     |            |                 |                           |              |              |              |              |              |              |              |              |                                     |
| J1       | 1-Methylpyrrole                   | 96-54-8    | 728             | 12.66±1.65                | 11.13±0.70   | 15.50±1.28   | 12.01±1.94   | 6.80±0.79    | 14.43±1.41   | 13.05±0.94   | 9.44±0.88    | 14.76±2.73   | MS/RI                               |
| J2       | 2-Methylpyrazine                  | 109-08-0   | 817             | ND                        | 63.69±1.82   | 207.93±15.26 | 86.51±5.25   | 26.88±4.54   | ND           | 128.29±15.13 | ND           | 137.63±13.08 | MS/RI                               |
| J3       | 2,5-Dimethylpyrazine              | 123-32-0   | 905             | 162.74±34.27              | 199.36±8.61  | 477.68±37.42 | 89.29±5.57   | 98.42±8.18   | 161.26±65.47 | 148.31±10.98 | 98.49±7.49   | 295.46±6.96  | MS/RI/O                             |
| J4       | 2-Acetylpyrrole                   | 1072-83-9  | 1060            | 220.18±28.62              | 138.11±10.27 | 467.98±20.87 | 378.41±9.05  | 117.80±20.29 | 293.50±10.44 | 459.69±19.32 | 340.35±31.52 | 445.50±9.10  | MS/RI                               |
| J5       | 2,6-Diethylpyrazine               | 13067-27-1 | 1074            | 10.72±2.05                | 13.01±0.53   | ND           | ND           | ND           | 15.15±0.65   | 21.64±0.92   | 14.62±0.63   | 16.17±0.15   | MS/RI/O                             |
| <b>K</b> | <b>Furans</b>                     |            |                 |                           |              |              |              |              |              |              |              |              |                                     |
| K1       | 3-Methylfuran                     | 930-27-8   | -               | 4.32±0.94                 | 3.51±0.05    | 10.24±0.90   | 4.71±0.19    | 2.03±0.25    | 7.12±0.63    | 6.22±1.46    | 4.67±0.54    | 9.98±1.40    | MS                                  |



Table S1 (Contd.)

| No.      | Aroma compounds                                        | CAS        | RI <sup>a</sup> | Compound content (µg /kg) |              |              |              |              |              |              |              |              | Identification methods <sup>b</sup> |
|----------|--------------------------------------------------------|------------|-----------------|---------------------------|--------------|--------------|--------------|--------------|--------------|--------------|--------------|--------------|-------------------------------------|
|          |                                                        |            |                 | FPS1                      | FPS2         | FPS3         | FPS4         | FPS5         | FPS6         | FPS7         | FPS8         | FPS9         |                                     |
| K2       | 2-Acetylfuran                                          | 1192-62-7  | 906             | 68.46±3.42                | 69.50±1.82   | 311.80±19.50 | 108.82±3.62  | 47.38±6.99   | 181.67±20.72 | 149.31±11.59 | 99.57±8.33   | 276.87±9.56  | MS/RI/O                             |
| <b>L</b> | <b>Others</b>                                          |            |                 |                           |              |              |              |              |              |              |              |              |                                     |
| L1       | Methanethiol                                           | 74-93-1    | -               | 23.39±9.72                | 7.57±0.13    | 14.71±3.54   | 8.88±1.19    | 4.71±0.32    | 13.67±1.96   | 12.01±1.64   | 7.81±0.84    | 13.58±2.89   | MS                                  |
| L2       | Pyridine                                               | 110-86-1   | 739             | ND                        | ND           | 19.43±2.13   | ND           | ND           | 11.79±1.17   | 14.47±1.57   | ND           | 20.07±2.43   | MS/RI                               |
| L3       | Dimethyl trisulfide                                    | 3658-80-8  | 962             | ND                        | ND           | 4.17±0.04    | ND           | ND           | 3.14±0.18    | ND           | ND           | 5.71±0.20    | MS/RI                               |
| L4       | <i>N</i> -Acetyl-3-pyrroline                           | 21399-13-3 | 1103            | ND                        | ND           | 45.67±0.36   | ND           | ND           | 16.68±1.49   | 19.42±0.81   | ND           | 45.79±1.65   | MS                                  |
| L5       | 5-(Methylsulfanyl)pentane nitrile                      | 59121-25-4 | 1196            | 7.85±2.30                 | 14.25±1.04   | 21.04±0.14   | 14.00±0.56   | 17.78±3.14   | 15.34±1.82   | 23.13±1.16   | 17.62±2.33   | 19.28±1.41   | MS/RI/O                             |
| L6       | Benzenepropanenitrile                                  | 645-59-0   | 1236            | 99.45±24.20               | 156.10±15.64 | 264.57±0.93  | 202.89±12.39 | 196.76±26.03 | 189.93±16.99 | 334.71±25.45 | 252.90±24.15 | 335.97±23.34 | MS/RI                               |
| L7       | 2-Oxabicyclo[2.2.2]octan-6-ol,1,3,3-trimethyl-,acetate | 57709-95-2 | 1337            | 30.09±4.10                | 37.12±2.09   | 56.80±0.66   | 48.70±3.18   | 33.84±3.67   | 33.99±2.01   | 56.00±2.86   | 44.73±2.13   | 64.36±2.62   | MS/RI                               |

a: Kováts retention indices calculated of each aroma compound on a non-polar HP-5MS capillary column (30 m × 250 µm × 0.25 µm, Agilent) with a homologous series of n-alkanes (C7-C30).

b: Identification methods: MS, RI, O and S represent being identifying by NIST 20 mass spectral database, linear retention indices reported in the species database (<http://webbook.nist.gov/chemistry/name-ser.html>) and literature, olfactometry, and standard chemical, respectively.

ND: Not detected.

**Table S2** rOAVs of the odor-active substances (rOAV>1) in nine FPS samples

| No. <sup>a</sup> | Compounds                        | Threshold <sup>b</sup><br>(µg /kg) | rOAV   |        |         |        |        |        |        |        |        |
|------------------|----------------------------------|------------------------------------|--------|--------|---------|--------|--------|--------|--------|--------|--------|
|                  |                                  |                                    | FPS1   | FPS2   | FPS3    | FPS4   | FPS5   | FPS6   | FPS7   | FPS8   | FPS9   |
| A2               | (+)- $\alpha$ -Pinene            | 33                                 | 1.93   | 2.28   | 2.86    | 2.27   | 1.92   | 1.41   | 2.39   | 1.69   | 1.91   |
| A4               | Myrcene                          | 42                                 | 115.77 | 101.18 | 75.11   | 90.49  | 71.82  | 56.53  | 81.17  | 70.01  | 64.06  |
| A7               | <i>D</i> -Limonene               | 210                                | 26.64  | 23.57  | 23.76   | 23.95  | 18.89  | 16.92  | 24.67  | 21.02  | 22.07  |
| B2               | Hydroxyacetone                   | 200                                | 2.46   | 1.80   | 4.90    | 2.46   | 1.29   | 3.36   | 2.17   | 2.00   | 5.32   |
| C2               | Acetic acid                      | 1050                               | 5.46   | 5.39   | 7.54    | 4.82   | 3.67   | 5.87   | 6.74   | 5.62   | 8.61   |
| D10              | Citronellol                      | 10                                 | 1.17   | 1.72   | 2.58    | 2.42   | 1.89   | 1.65   | 2.63   | 2.21   | 2.83   |
| D11              | 1-Dodecanol                      | 6.6                                | 0.00   | 0.00   | 0.97    | 0.36   | 0.28   | 0.54   | 0.83   | 0.40   | 1.06   |
| D5               | Linalool                         | 3.8                                | 111.11 | 98.71  | 97.65   | 106.18 | 82.10  | 68.53  | 104.24 | 98.74  | 102.40 |
| D8               | (-)- $\alpha$ -Terpineol         | 300                                | 1.87   | 2.04   | 2.21    | 2.35   | 1.66   | 1.55   | 2.36   | 2.00   | 2.50   |
| E1               | 2-Methylpropanal                 | 3.4                                | 56.07  | 29.06  | 61.12   | 39.06  | 20.64  | 50.44  | 46.05  | 40.62  | 65.23  |
| E13              | ( <i>E,E</i> )-2,4-Heptadienal   | 30                                 | 0.93   | 1.06   | 3.91    | 1.96   | 1.73   | 2.48   | 2.58   | 2.30   | 4.75   |
| E14              | Benzeneacetaldehyde              | 9                                  | 17.63  | 20.98  | 45.13   | 30.21  | 30.21  | 41.96  | 31.50  | 42.66  | 64.03  |
| E16              | $\epsilon$ -2-Nonenal            | 66                                 | 0.22   | 0.49   | 0.00    | 1.13   | 0.52   | 0.82   | 0.60   | 0.65   | 0.00   |
| E19              | (2 <i>E</i> )-2-Decenal          | 150                                | 0.27   | 0.33   | 0.96    | 0.64   | 0.65   | 0.82   | 0.94   | 0.69   | 1.40   |
| E2               | 3-Methylbutanal                  | 10.8                               | 35.61  | 25.88  | 28.48   | 17.94  | 13.40  | 20.84  | 20.59  | 20.79  | 23.99  |
| E21              | ( <i>E,Z</i> )-2,4-Decadienal    | 4                                  | 1.96   | 3.12   | 11.60   | 6.17   | 6.23   | 8.67   | 9.57   | 8.62   | 19.05  |
| E22              | (2 <i>E,4E</i> )-Deca-2,4-dienal | 41                                 | 1.28   | 2.04   | 8.77    | 4.11   | 4.51   | 5.71   | 7.94   | 6.42   | 12.64  |
| E3               | 2-Methylbutanal                  | 23                                 | 10.29  | 7.02   | 13.88   | 7.83   | 4.63   | 9.81   | 9.81   | 9.26   | 12.99  |
| E7               | Methional                        | 0.05                               | 410.96 | 375.60 | 1189.12 | 436.99 | 230.94 | 562.28 | 377.94 | 361.06 | 460.69 |
| G2               | Eucalyptol                       | 10                                 | 56.42  | 48.47  | 57.21   | 52.36  | 40.78  | 36.02  | 54.23  | 41.81  | 48.75  |
| L3               | Dimethyl trisulfide              | 4.2                                | 0.00   | 0.00   | 0.99    | 0.00   | 0.00   | 0.75   | 0.00   | 0.00   | 1.36   |
| L1               | Methanethiol                     | 0.34                               | 68.78  | 22.26  | 43.28   | 26.13  | 13.84  | 40.19  | 35.32  | 22.96  | 39.94  |

a: The numbers assigned to the compounds are in line with those specified in TableS1.

b: Odor thresholds were referenced from the book (Odor thresholds compilations of odor threshold values in air, water and other media) and a literature.

**Table S3** Odor intensity of the odorants in nine FPS samples identified using GC-O

| No. <sup>a</sup> | Compounds                                                   | GC-O |      |      |      |      |      |      |      |      |
|------------------|-------------------------------------------------------------|------|------|------|------|------|------|------|------|------|
|                  |                                                             | FPS1 | FPS2 | FPS3 | FPS4 | FPS5 | FPS6 | FPS7 | FPS8 | FPS9 |
| A1               | <i>α</i> -Thujene                                           | 3    | 4    | 3    | 3    | 3    | 2    | 3    | 3    | 3    |
| A11              | Terpinolene                                                 | 3    | 2    | 3    | 3    | 3    | 3    | 3    | 3    | 3    |
| B9               | Furyl hydroxymethyl ketone                                  | 2    | 2    | 1    | 1    | 0    | 1    | 3    | 2    | 2    |
| B10              | 2-Pyrrolidinone                                             | 0    | 0    | 0    | 0    | 0    | 2    | 0    | 0    | 0    |
| B11              | 3,5-Dihydroxy-6-methyl-2 <i>H</i> -pyran-4(3 <i>H</i> )-one | 4    | 4    | 4    | 3    | 4    | 4    | 4    | 4    | 3    |
| C2               | Acetic acid                                                 | 3    | 2    | 2    | 1    | 2    | 2    | 2    | 2    | 3    |
| D4               | Sabinene hydrate                                            | 0    | 0    | 0    | 0    | 0    | 0    | 0    | 3    | 3    |
| D5               | Linalool                                                    | 5    | 5    | 5    | 5    | 4    | 4    | 4    | 5    | 5    |
| D6               | Phenylethyl Alcohol                                         | 0    | 0    | 0    | 0    | 0    | 0    | 0    | 2    | 1    |
| D7               | (-)-Terpinen-4-ol                                           | 3    | 3    | 4    | 4    | 4    | 3    | 4    | 3    | 5    |
| D9               | gamma-Terpineol                                             | 0    | 0    | 0    | 0    | 0    | 0    | 0    | 1    | 0    |
| E1               | 2-Methylpropanal                                            | 0    | 1    | 0    | 0    | 0    | 0    | 0    | 1    | 1    |
| E2               | 3-Methylbutanal                                             | 3    | 2    | 1    | 1    | 1    | 1    | 1    | 1    | 1    |
| E7               | Methional                                                   | 3    | 4    | 4    | 3    | 4    | 4    | 4    | 4    | 4    |
| E14              | Benzeneacetaldehyde                                         | 4    | 4    | 4    | 3    | 4    | 4    | 4    | 4    | 4    |
| E16              | ( <i>E</i> )-2-Nonenal                                      | 3    | 4    | 0    | 3    | 4    | 0    | 3    | 4    | 0    |
| E19              | (2 <i>E</i> )-2-Decenal                                     | 3    | 3    | 3    | 2    | 3    | 2    | 2    | 2    | 3    |
| E21              | ( <i>E,Z</i> )-2,4-Decadienal                               | 2    | 3    | 2    | 2    | 2    | 2    | 2    | 1    | 1    |
| E22              | (2 <i>E</i> ,4 <i>E</i> )-Deca-2,4-dienal                   | 3    | 2    | 2    | 2    | 3    | 3    | 3    | 2    | 2    |
| G2               | Eucalyptol                                                  | 2    | 3    | 3    | 2    | 2    | 3    | 3    | 3    | 3    |
| H2               | Acetic acid ethenyl ester                                   | 2    | 2    | 1    | 0    | 2    | 1    | 1    | 1    | 1    |
| H9               | Geranyl acetate                                             | 3    | 2    | 3    | 3    | 3    | 3    | 3    | 3    | 2    |
| J3               | 2,5-Dimethylpyrazine                                        | 3    | 3    | 3    | 2    | 3    | 3    | 3    | 3    | 3    |
| J5               | 2,6-Diethylpyrazine                                         | 1    | 0    | 0    | 0    | 0    | 0    | 0    | 0    | 0    |
| K2               | 2-Acetylfuran                                               | 3    | 3    | 3    | 3    | 3    | 3    | 3    | 3    | 3    |
| L5               | 5-(Methylsulfanyl)pentanenitrile                            | 0    | 0    | 0    | 2    | 0    | 0    | 0    | 0    | 0    |

a: The numbers assigned to the compounds are in line with those specified in TableS1.
